# Supplementary material for: International estimated fetal weight standards of the INTERGROWTH‐21st Project
Source: PubMed Central journal article supplement (PMC5516164; doi:10.1002/uog.17347), 2017-03-05

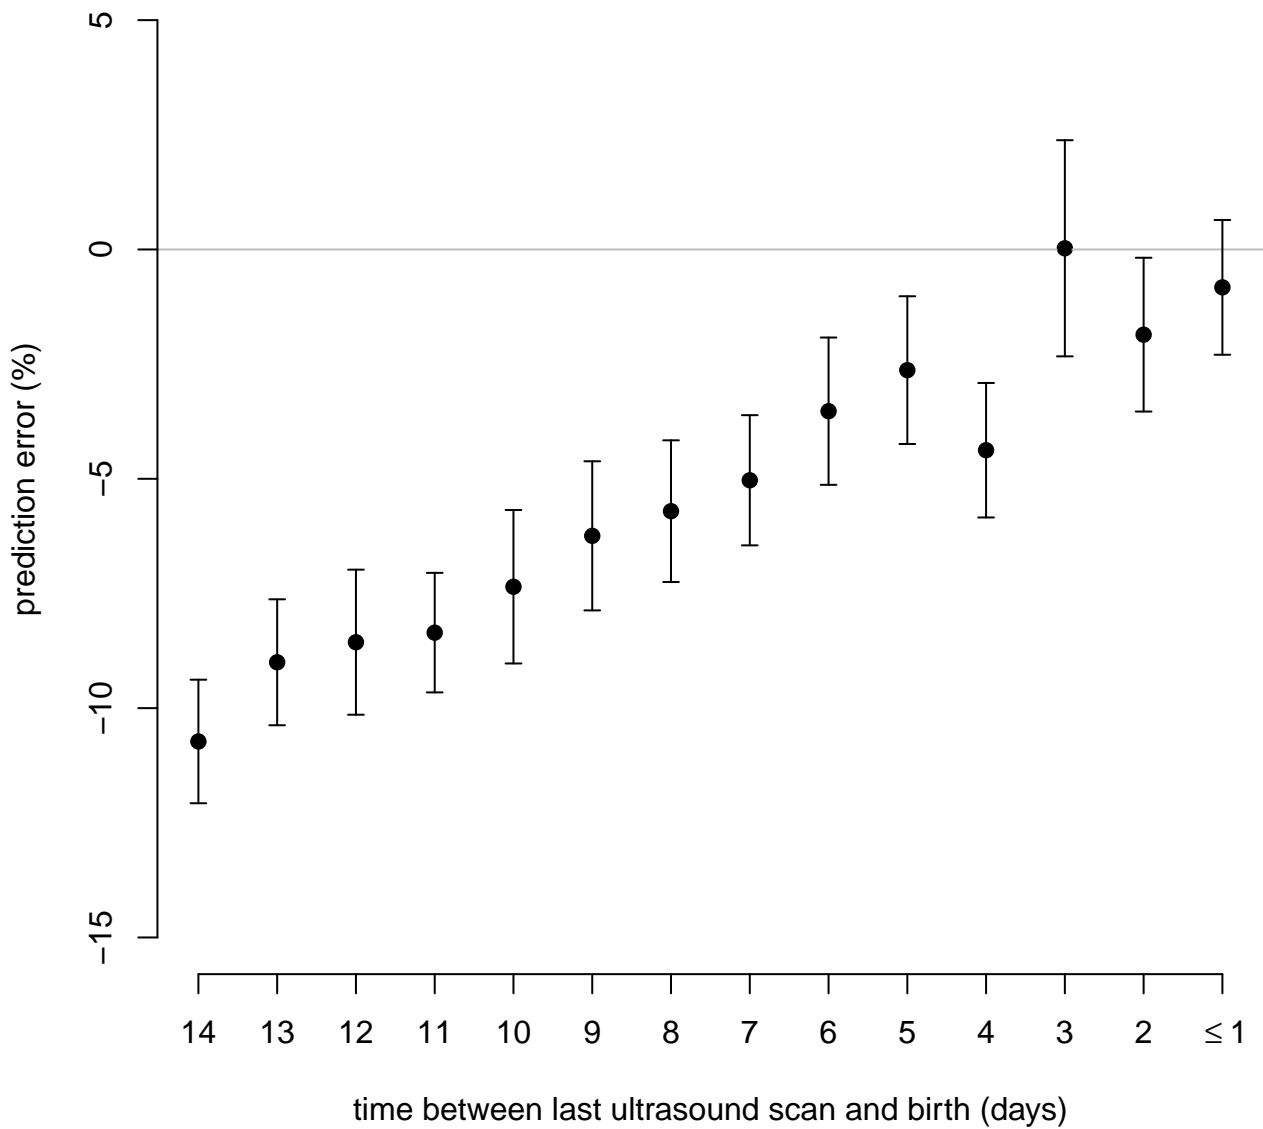

Supplement: UOG-49-478-s002.pdf [file UOG-49-478-s002.pdf]
